# Supplementary material for: Novel Bifunctional Affibody Molecules with Specific Binding to Both EBV LMP1 and LMP2 for Targeted Therapy of Nasopharyngeal Carcinoma
Source: MDPI journal article supplement (doi:10.3390/ijms241210126), 2023-06-14

## Supplementary materials

### Journal:

International Journal of Molecular Science

### Title:

Novel Bifunctional affibody molecules specific binding to both EBV LMP1 and LMP2 for targeted therapy of nasopharyngeal carcinoma

### Authors:

Saidu Kamara\*, Yanru Guo\*, He Wen, Ying Liu, Lei Liu, Maolin Zheng, Jing Zhang, Luqi Zhou, Jun Chen, Shanli Zhu, Lifang Zhang

\* These authors contributed equally to this work.

Institute of Molecular Virology and Immunology, Department of Microbiology and Immunology, School of Basic Medical Sciences, Wenzhou Medical University, Wenzhou 325035, Zhejiang, PR China.

Correspondence: Lifang Zhang ([wenzhouzlf@126.com](mailto:wenzhouzlf@126.com)), +8613634286323

### Supplementary Table S1. Primary antibodies used for Western blotting assay

| Antibody                            | Catalog number | Source                    |
|-------------------------------------|----------------|---------------------------|
| p-Raf-1 <sup>(Ser338)</sup>         | 9427S          | Cell Signaling Technology |
| Raf-1                               | 53745S         | Cell Signaling Technology |
| p-MEK1/2 <sup>(Ser217/Ser221)</sup> | 9154S          | Cell Signaling Technology |
| MEK1/2                              | 4694S          | Cell Signaling Technology |
| p-ERK1/2 <sup>(Thr202/Thr204)</sup> | 4370S          | Cell Signaling Technology |
| ERK1/2                              | 4695S          | Cell Signaling Technology |
| p-P90RSK <sup>(Ser380)</sup>        | 11989S         | Cell Signaling Technology |
| p90RSK                              | 9355S          | Cell Signaling Technology |

|       |           |                           |
|-------|-----------|---------------------------|
| c-Fos | 2250S     | Cell Signaling Technology |
| c-Myc | 18583S    | Cell Signaling Technology |
| GAPDH | AB-M-M001 | Hangzhou Goodhere         |

**Supplementary Figure S1.** The binding ability of different concentrations of purified affibody molecules to LMP1 **A-E** and LMP2 **F-J** using SPR. **E and J.** Z<sub>WT</sub> set as affibbody negative control.

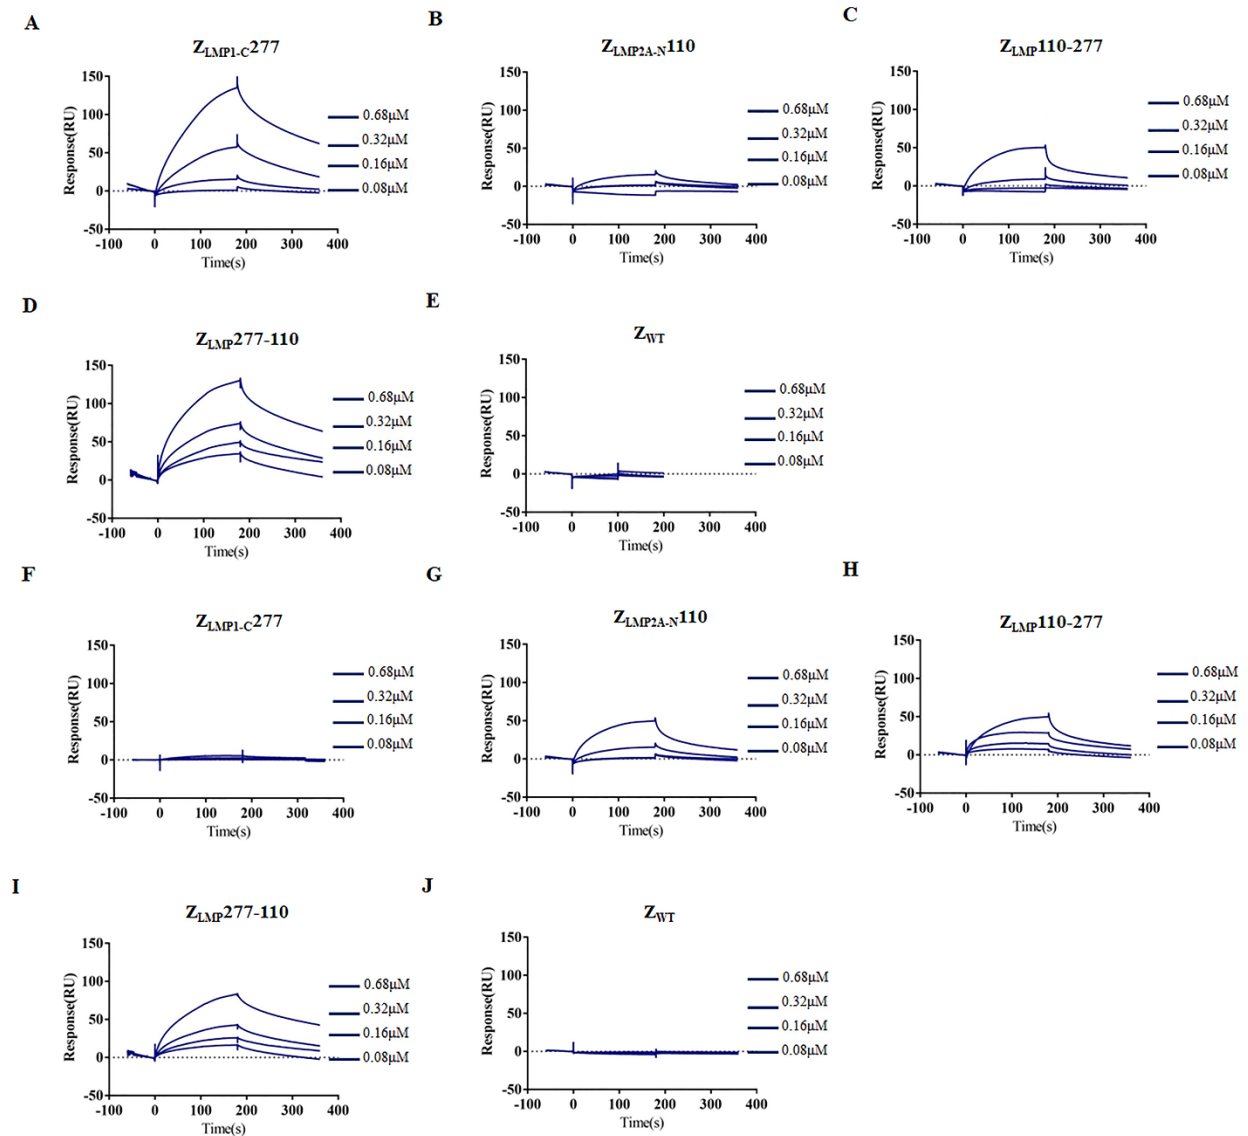

**Supplementary Fig. S2.** The fluorescence intensity of C666-1 incubated with  $Z_{LMP277-110}$  was higher than that incubated with  $Z_{LMP110-277}$ .

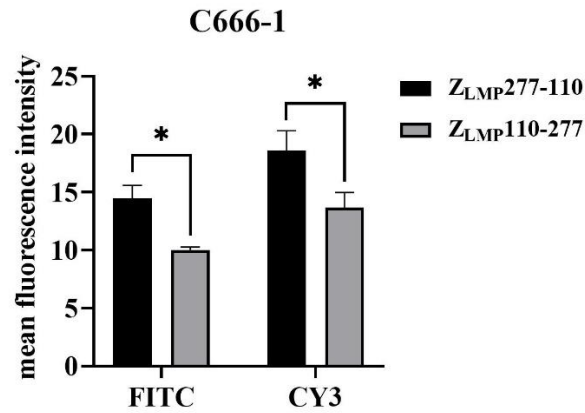

Fig. 1. Mean fluorescence intensity of C666-1 cell treated with  $Z_{LMP277-110}$  and  $Z_{LMP110-277}$

**Supplementary Figure S3.** In vivo biodistribution of affibody molecules in healthy nude mice. **A and B.** After tail vein injection with Dylight 755-labelled affibody molecules, fluorescence images were obtained from mice at different time points. Kidney uptake was prominent for the accumulation of affibody molecules. The accumulation of affibody molecules maximally occurred at 8 h after injection and then decreased over the time course. The signal was undetectable at 72 h.

A

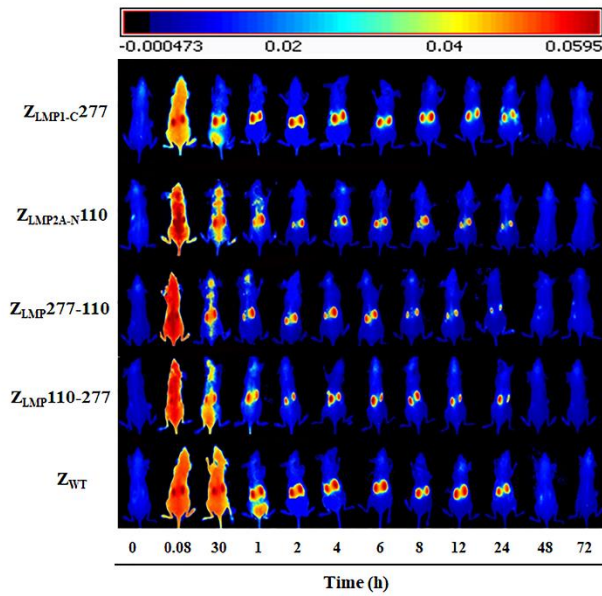

B

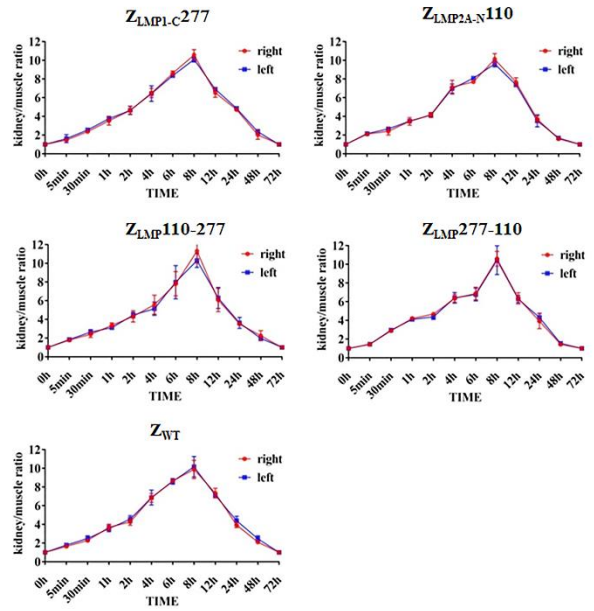

**Supplementary Figure S4.** A-D C666-1 and E-H CNE-2Z cells were treated with different concentrations of  $Z_{LMP1-C}$  affibody for 72 h. IC50 values were calculated using graph pad prism.

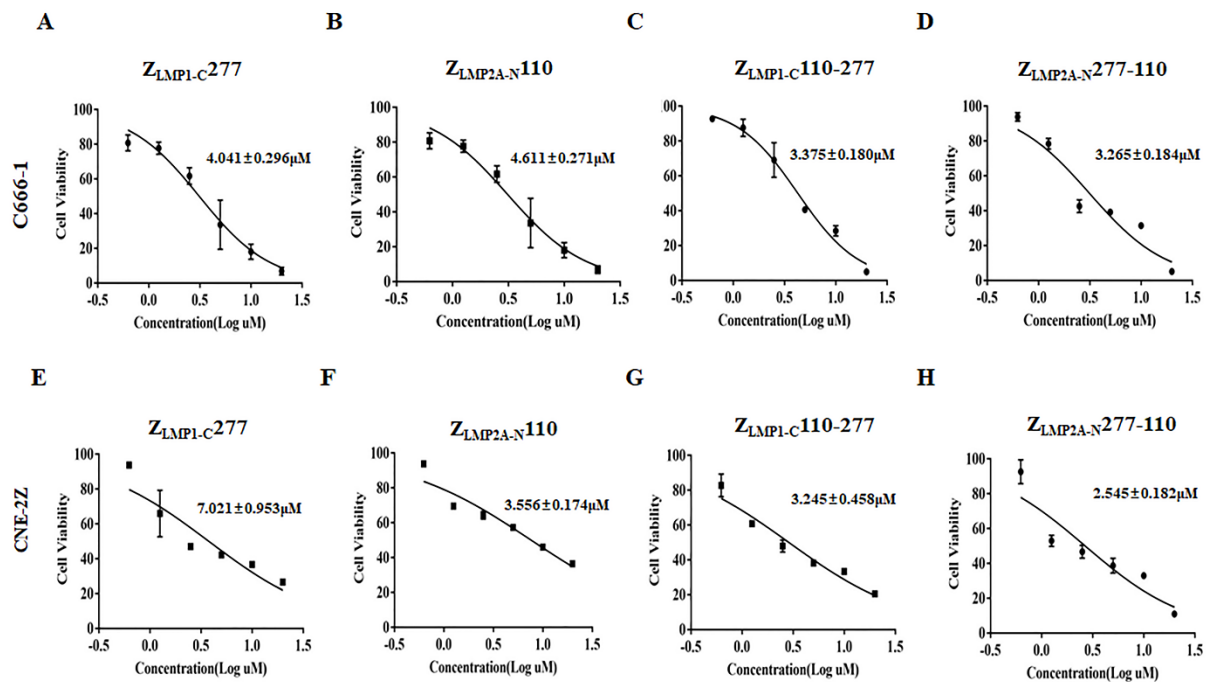

Supplement: s1 [file s1]
